# Supplementary material for: ME3BP-7 is a targeted cytotoxic agent that rapidly kills pancreatic cancer cells expressing high levels of monocarboxylate transporter MCT1
Source: eLife. 2025 May 20;13:RP94488. doi: 10.7554/eLife.94488 (PMC12092006; doi:10.7554/eLife.94488)
Supplement: Supplementary file 1. [file elife-94488-supp1.xlsx]

## Sheet: Sheet1
Mouse no	Arm	Heart	Lungs	Liver	Spleen	Kidney	Pancreas	Stomach and Duodenum	Small Intertine	Colon	Reproductive (endometrium and ovaries)
1	Control	0	0	0	0	0	1 (edema)	0	0	0	0
2	Control	0	0	0	0	0	1 (edema)	0	0	0	0
3	Control	0	0	0	0	0	0	0	0	0	0
4	Control	0	0	0	0	0	0	0	1 (short villi)	0	0
5	Control	0	0	0	0	0	0	0	2 (short villi)	0	0
6	Control	0	0	0	0	0	0	0	0	0	0
7	Control	0	0	0	0	0	0	0	0	0	0
8	Control	0	0	0	0	0	1 (edema)	0	0	0	0
9	Control	0	0	0	0	0	0	0	0	0	0
1	ME3BP-7 (25 mg/kg)	0	0	0	0	0	0	0	0	0	0
2	ME3BP-7 (25 mg/kg)	0	0	0	1 (calcification)	0	0	0	0	0	0
3	ME3BP-7 (25 mg/kg)	0	0	1	0	2 (vacuolar changes in tubules with regeneration)	1 (edema)	0	0	0	0
4	ME3BP-7 (25 mg/kg)	0	0	0	0	0	0	0	0	0	0
5	ME3BP-7 (25 mg/kg)	0	0	0	0	1(vacuolar changes in tubules)	0	0	0	0	0
6	ME3BP-7 (25 mg/kg)	0	0	0	0	0	1 (edema)	0	0	0	0
7	ME3BP-7 (25 mg/kg)	0	0	0	0	0	0	0	0	0	0
0	No changes
1	Minimal changes of unknown significance
2	Minimal pathological changes of unlikely significance
3	Moderate Pathological changes
4	Severe pathological changes
5	Death causing changes
